# Supplementary material
Source: PubMed Central journal article supplement (PMC8995217)

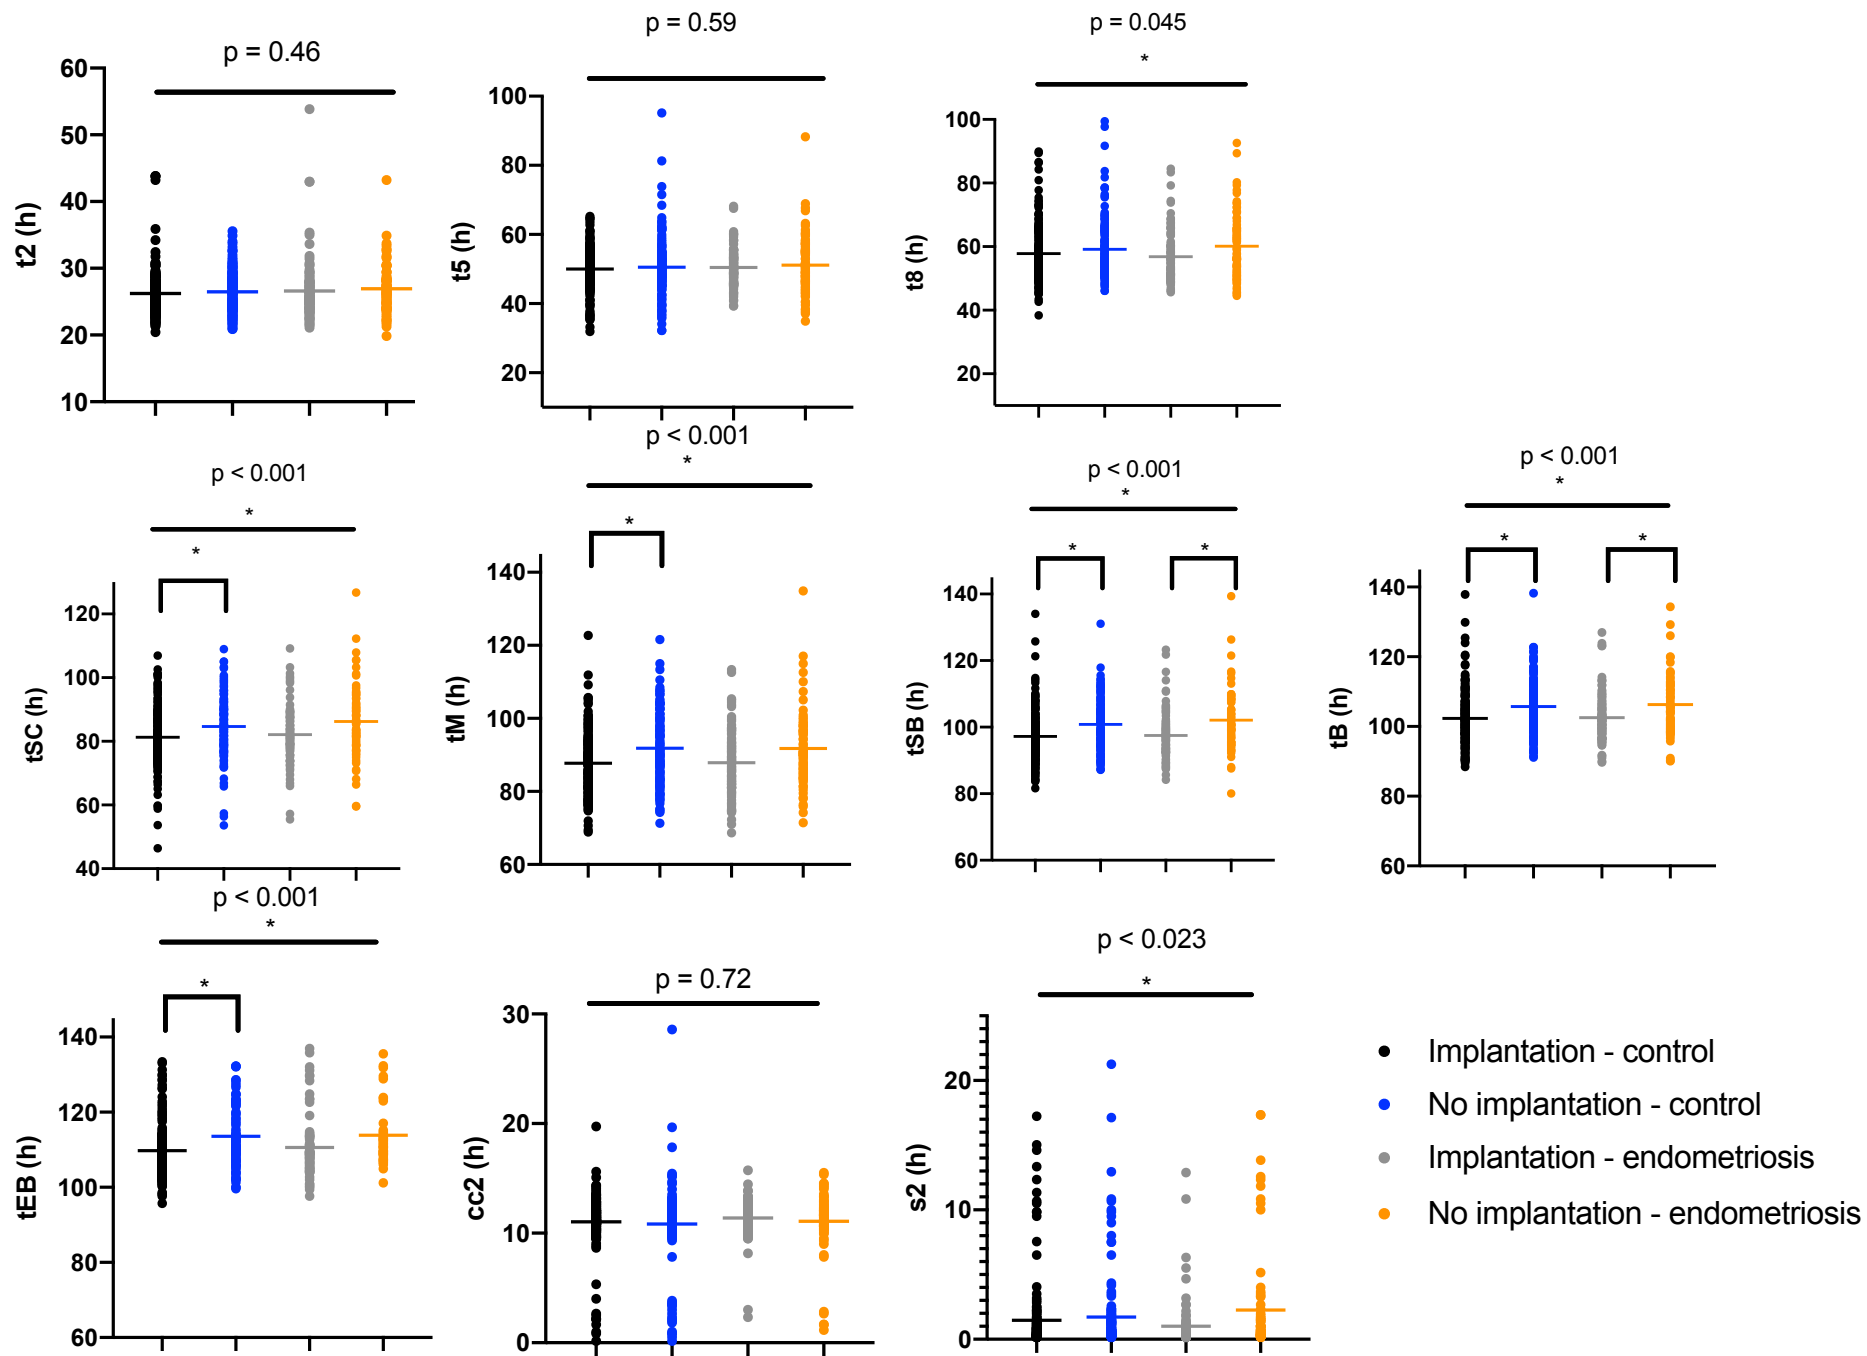

Supplement: 10815_2022_2406_MOESM1_ESM.pdf [file 10815_2022_2406_MOESM1_ESM.pdf]

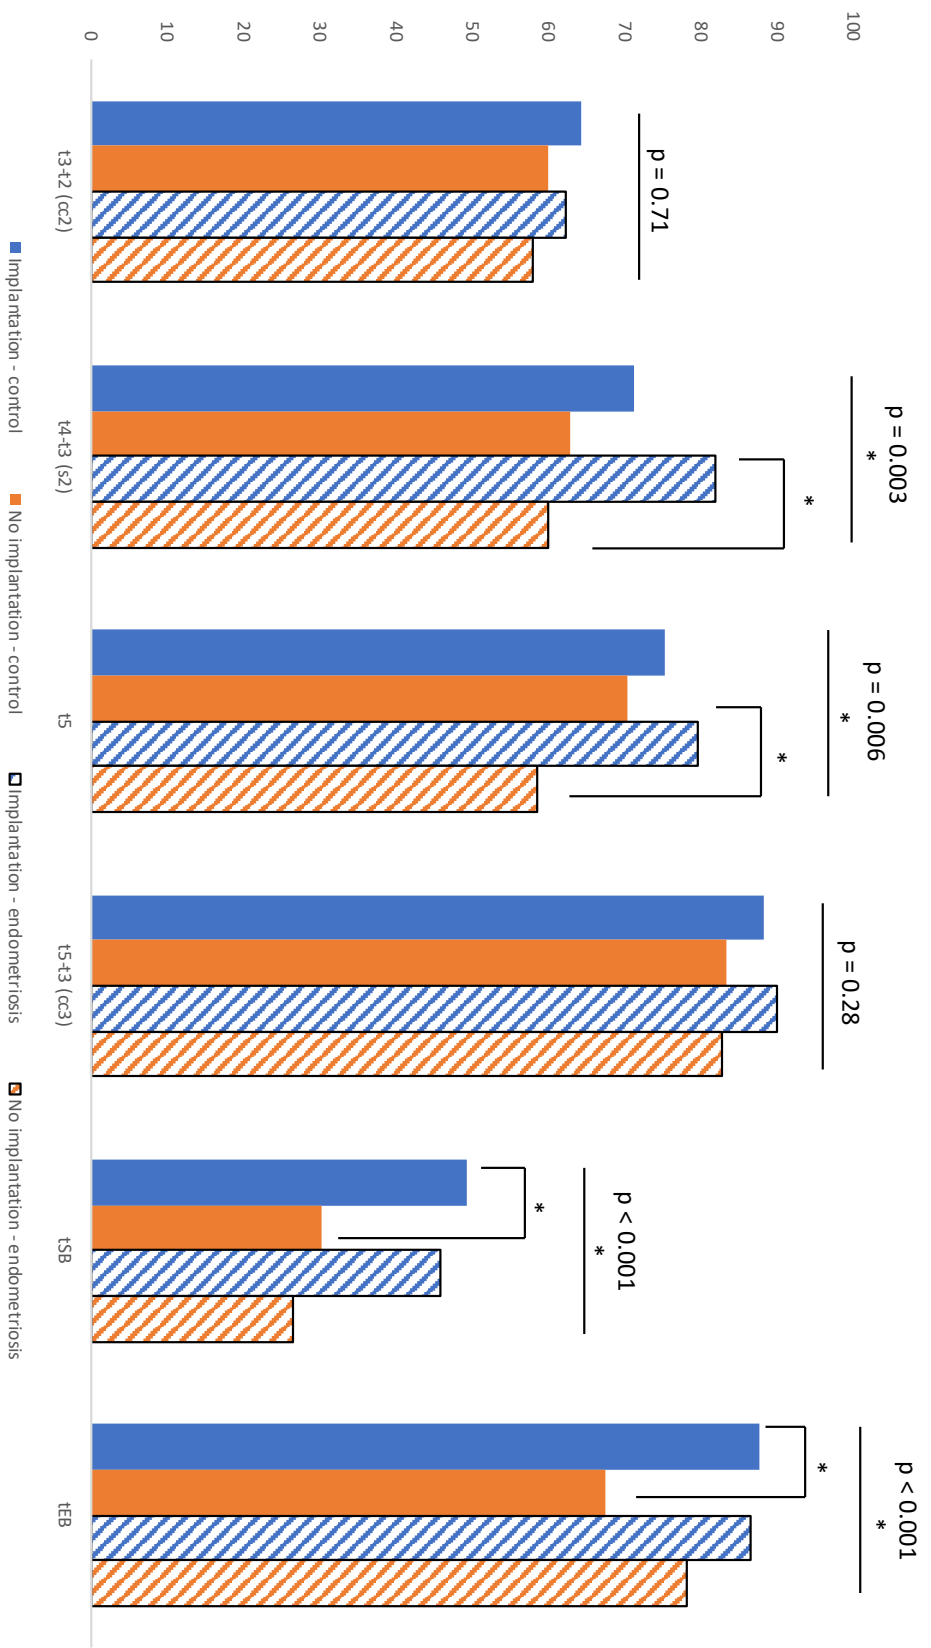

Supplement: 10815_2022_2406_MOESM2_ESM.pdf [file 10815_2022_2406_MOESM2_ESM.pdf]
